# Supplementary material for: Platelet-derived calpain cleaves the endothelial protease-activated receptor 1 to induce vascular inflammation in diabetes
Source: Basic Res Cardiol. 2020 Dec 1;115(6):75. doi: 10.1007/s00395-020-00833-9 (PMC7716944; doi:10.1007/s00395-020-00833-9)
Supplement: Supplementary file 2 — Supplementary file2 (XLSX 25 KB) [file 395_2020_833_MOESM2_ESM.xlsx]

## Sheet: Tabelle1
Supplementary Table 2: Par-1 cleavage by Calpain
Protein Group	Protein ID	Protein Accession	Peptide	Unique	-10lgP	Mass	ppm	m/z	z	RT	Scan	#Spec	Start	End	PTM
1	2	sp|P25116|PAR1_HUMAN	MGPRRLLLVAACF.S	Y	38.24	1445.8	1.5	723.908	2	52.05	23599	3	1	13
1	2	sp|P25116|PAR1_HUMAN	MGPRRLLLVAAC.F	Y	37.86	1298.73	0.8	433.918	3	36.41	17796	2	1	12
1	2	sp|P25116|PAR1_HUMAN	MGPRRLLLVAA.C	Y	34.3	1195.72	1	598.869	2	32.43	15846	3	1	11
1	2	sp|P25116|PAR1_HUMAN	F.SLCGPLL.S	Y	29.39	701.378	1.4	702.386	1	45.81	21375	2	14	20
1	2	sp|P25116|PAR1_HUMAN	S.ARTRARRPESKATNATLDPRSF.L	Y	30.28	2500.34	0.3	626.092	4	16.46	6702	1	22	43
1	2	sp|P25116|PAR1_HUMAN	R.ARRPESKATNATLDPRSF.L	Y	44.91	2016.05	0.3	505.02	4	20	8778	5	26	43
1	2	sp|P25116|PAR1_HUMAN	R.ARRPESKATNATLDPRSFLLR.N	Y	43.75	2398.32	1.9	600.588	4	33.25	16269	6	26	46
1	2	sp|P25116|PAR1_HUMAN	R.ARRPESKATNATLDPR.S	Y	40.35	1781.95	-0.9	446.494	4	10.63	3468	2	26	41
1	2	sp|P25116|PAR1_HUMAN	R.ARRPESKATNATLDPRSFLL.R	Y	33.67	2242.22	1.9	561.563	4	37.97	18469	4	26	45
1	2	sp|P25116|PAR1_HUMAN	A.RRPESKATNATLDPRSFLLR.N	Y	34.48	2327.28	1.6	466.464	5	33.24	16264	2	27	46
1	2	sp|P25116|PAR1_HUMAN	R.RPESKATNATLDPRSFLL.R	Y	44.22	2015.08	1.1	672.701	3	41.73	19906	1	28	45
1	2	sp|P25116|PAR1_HUMAN	R.RPESKATNATLDPRSF.L	Y	39.88	1788.91	0.1	597.311	3	22.43	10237	1	28	43
1	2	sp|P25116|PAR1_HUMAN	E.SKATNATLDPRSFLL.R	Y	44.14	1632.88	3	817.451	2	45.72	21342	2	31	45
1	2	sp|P25116|PAR1_HUMAN	S.KATNATLDPRSFLL.R	Y	45.17	1545.85	2.8	773.935	2	45.86	21393	4	32	45
1	2	sp|P25116|PAR1_HUMAN	S.KATNATLDPRSF.L	Y	36.25	1319.68	0.4	440.902	3	24.74	11579	1	32	43
1	2	sp|P25116|PAR1_HUMAN	K.ATNATLDPRSFLLRNPNDKYEPFWEDEEK.N	Y	49.22	3494.67	1.1	874.677	4	50.3	22983	2	33	61
1	2	sp|P25116|PAR1_HUMAN	K.ATNATLDPRSF.L	Y	44.97	1191.59	0.7	596.802	2	29.65	14355	6	33	43
1	2	sp|P25116|PAR1_HUMAN	K.ATNATLDPRSFLL.R	Y	44.55	1417.76	0.7	709.886	2	51.76	23485	4	33	45
1	2	sp|P25116|PAR1_HUMAN	K.ATNATLDPRSFLLR.N	Y	44.45	1573.86	1.2	787.937	2	43.96	20704	6	33	46
1	2	sp|P25116|PAR1_HUMAN	K.ATNATLDPRSFL.L	Y	40.17	1304.67	2.7	653.345	2	45.56	21286	1	33	44
1	2	sp|P25116|PAR1_HUMAN	K.ATNATLDPRSFLLRNPNDKYEPFWEDEEKNESGLTEYRLVS.I	Y	38.69	4843.34	2.8	969.677	5	53.29	24044	1	33	73
1	2	sp|P25116|PAR1_HUMAN	A.TNATLDPRSFLL.R	Y	42.2	1346.72	1.7	674.368	2	52.04	23595	2	34	45
1	2	sp|P25116|PAR1_HUMAN	A.TNATLDPRSFLLR.N	Y	42.06	1502.82	1	501.948	3	44.53	20912	2	34	46
1	2	sp|P25116|PAR1_HUMAN	T.NATLDPRSFLLR.N	Y	42.73	1401.77	1.9	468.266	3	44.5	20904	2	35	46
1	2	sp|P25116|PAR1_HUMAN	T.NATLDPRSFLL.R	Y	35.51	1245.67	1.6	623.844	2	52.72	23838	2	35	45
1	2	sp|P25116|PAR1_HUMAN	T.NATLDPRSF.L	Y	34.59	1019.5	1.8	510.76	2	30.02	14547	1	35	43
1	2	sp|P25116|PAR1_HUMAN	N.ATLDPRSFLLR.N	Y	38.19	1287.73	0.9	644.873	2	44.83	21021	9	36	46
1	2	sp|P25116|PAR1_HUMAN	N.ATLDPRSFLLRNPNDKYEPFWEDEEKNESGLTEYRLVS.I	Y	34.02	4557.21	2.5	912.451	5	53.73	24193	1	36	73
1	2	sp|P25116|PAR1_HUMAN	N.ATLDPRSFLLRNPNDKYEPFWEDEEKNESGLTE.Y	Y	29.22	3938.86	1.7	985.724	4	51.82	23510	1	36	68
1	2	sp|P25116|PAR1_HUMAN	A.TLDPRSFLLR.N	Y	30.62	1216.69	0.2	406.572	3	43.95	20702	4	37	46
1	2	sp|P25116|PAR1_HUMAN	T.LDPRSFLLRNPNDKYEPFWEDEEKNESGLTEYRLV.S	Y	36.12	4298.09	2.1	1075.53	4	54.37	24416	2	38	72
1	2	sp|P25116|PAR1_HUMAN	T.LDPRSFLLRNPNDKYEPFWEDEEK.N	Y	35.94	3036.46	3	760.125	4	49.82	22808	1	38	61
1	2	sp|P25116|PAR1_HUMAN	T.LDPRSFLLR.N	Y	32.27	1115.64	-1.3	372.889	3	42.47	20174	6	38	46
1	2	sp|P25116|PAR1_HUMAN	T.LDPRSFLLRNPNDKYEPFWEDEEKNESGLTEYRLVS.I	Y	32.04	4385.12	3.8	878.035	5	53.12	23984	1	38	73
1	2	sp|P25116|PAR1_HUMAN	L.DPRSFLLR.N	Y	32.96	1002.56	0.1	502.288	2	42.52	20192	2	39	46
1	2	sp|P25116|PAR1_HUMAN	F.LLRNPNDKYEPFWEDEEKNESGLTEYRLV.S	Y	59.53	3582.73	2	896.691	4	46.32	21587	3	44	72
1	2	sp|P25116|PAR1_HUMAN	F.LLRNPNDKYEPFWEDEEKNESGLT.E	Y	58.56	2922.37	1.6	1462.19	2	38.28	18591	3	44	67
1	2	sp|P25116|PAR1_HUMAN	F.LLRNPNDKYEPFWEDEEKNESGLTE.Y	Y	57.92	3051.41	2.2	1018.15	3	38.42	18647	2	44	68
1	2	sp|P25116|PAR1_HUMAN	F.LLRNPNDKYEPFWEDEEKNESGLTEYRLVSIN.K	Y	56.72	3896.89	3.9	975.232	4	47.36	21953	1	44	75
1	2	sp|P25116|PAR1_HUMAN	F.LLRNPNDKYEPFWEDEEKNESGLTEYRLVS.I	Y	55.19	3669.76	1.5	918.448	4	44.53	20913	1	44	73
1	2	sp|P25116|PAR1_HUMAN	F.LLRNPNDKYEPFWEDEEK.N	Y	54.95	2321.1	1.1	774.707	3	34.27	16801	2	44	61
1	2	sp|P25116|PAR1_HUMAN	F.LLRNPNDKYEPFWEDEEKNE.S	Y	53.77	2564.18	0.4	855.735	3	34.62	16968	1	44	63
1	2	sp|P25116|PAR1_HUMAN	F.LLRNPNDKYEPFWEDEEKNESGLTEY.R	Y	52.12	3214.47	6.3	804.631	4	41.97	19989	2	44	69
1	2	sp|P25116|PAR1_HUMAN	F.LLRNPNDKYEPFWEDEEKNESGLTEYRLVSINK.S	Y	44.46	4024.98	3	1007.26	4	43.67	20598	1	44	76
1	2	sp|P25116|PAR1_HUMAN	F.LLRNPNDKYEPFWEDEEKN(+.98)ESGLTEYRLVS.I	Y	43.77	3670.74	8.7	735.162	5	44.49	20898	1	44	73	Deamidation (NQ)
1	2	sp|P25116|PAR1_HUMAN	F.LLRNPNDKY.E	Y	37.22	1131.6	3	566.811	2	14.92	5802	2	44	52
1	2	sp|P25116|PAR1_HUMAN	L.RNPNDKYEPFWEDEEKNESGLTEYRLV.S	Y	71.71	3356.56	1.4	840.148	4	44.41	20869	3	46	72
1	2	sp|P25116|PAR1_HUMAN	L.RNPNDKYEPFWEDEEKNESGLTEYRLVSIN.K	Y	71.1	3670.72	0.7	1224.58	3	45.87	21400	3	46	75
1	2	sp|P25116|PAR1_HUMAN	L.RNPNDKYEPFWEDEEKNESGLTEYRLVS.I	Y	67.19	3443.59	0.4	861.905	4	42.78	20287	3	46	73
1	2	sp|P25116|PAR1_HUMAN	L.RNPNDKYEPFWEDEEKNESGLTE.Y	Y	65.6	2825.24	1.4	1413.63	2	35.6	17420	3	46	68
1	2	sp|P25116|PAR1_HUMAN	L.RNPNDKYEPFWEDEEKNESGLT.E	Y	64.43	2696.2	1.8	1349.11	2	35.23	17256	5	46	67
1	2	sp|P25116|PAR1_HUMAN	L.RNPNDKYEPFWEDEEK.N	Y	60.67	2094.93	-0.7	1048.47	2	30.08	14580	3	46	61
1	2	sp|P25116|PAR1_HUMAN	L.RNPNDKYEPFWEDEEKNE.S	Y	57.14	2338.01	2.9	780.347	3	30.65	14881	1	46	63
1	2	sp|P25116|PAR1_HUMAN	L.RNPNDKYEPFWEDEEKNESGLTEYRLVSINK.S	Y	55.87	3798.81	4.4	760.773	5	42.01	20000	3	46	76
1	2	sp|P25116|PAR1_HUMAN	L.RNPNDKYEPFWEDEEKNESGLTEY.R	Y	50.06	2988.3	2.3	997.111	3	39.71	19155	2	46	69
1	2	sp|P25116|PAR1_HUMAN	L.RNPNDKYEPFWEDEEKNESG.L	Y	47.67	2482.07	2.3	828.365	3	30.21	14647	2	46	65
1	2	sp|P25116|PAR1_HUMAN	L.RNPNDKYEPFWEDEE.K	Y	37.76	1966.83	-0.7	984.423	2	36.02	17619	1	46	60
1	2	sp|P25116|PAR1_HUMAN	L.RNPNDKYEPFWE.D	Y	31.41	1593.72	4.4	797.871	2	34.8	17057	1	46	57
1	2	sp|P25116|PAR1_HUMAN	R.NPNDKYEPFWEDEEKNESGLTEYRLV.S	Y	68.87	3200.46	1.9	1067.83	3	47.88	22135	2	47	72
1	2	sp|P25116|PAR1_HUMAN	R.NPNDKYEPFWEDEEKNESGLTEYRLVS.I	Y	63.3	3287.49	0	1096.84	3	46.04	21475	2	47	73
1	2	sp|P25116|PAR1_HUMAN	R.NPNDKYEPFWEDEEKNE.S	Y	57.45	2181.91	0.2	1091.96	2	34.92	17114	2	47	63
1	2	sp|P25116|PAR1_HUMAN	R.NPNDKYEPFWEDEEKNESGLTEYRLVSIN.K	Y	57.21	3514.62	0.6	1172.55	3	48.82	22467	2	47	75
1	2	sp|P25116|PAR1_HUMAN	R.NPNDKYEPFWEDEEK.N	Y	54.93	1938.83	-1.1	970.42	2	34.38	16857	4	47	61
1	2	sp|P25116|PAR1_HUMAN	R.NPNDKYEPFWEDEEKNESGLT.E	Y	49.96	2540.1	1.6	1271.06	2	39.23	18970	3	47	67
1	2	sp|P25116|PAR1_HUMAN	R.NPNDKYEPFWEDEEKNESGLTEYRLVSINK.S	Y	47.79	3642.71	1.1	729.55	5	44.83	21023	2	47	76
1	2	sp|P25116|PAR1_HUMAN	R.NPNDKYEPFWEDEEKNESG.L	Y	41.89	2325.97	2.4	1163.99	2	34.5	16912	2	47	65
1	2	sp|P25116|PAR1_HUMAN	R.NPNDKYEPFWEDEEKNESGLTE.Y	Y	39.84	2669.14	1.6	1335.58	2	39.54	19091	2	47	68
1	2	sp|P25116|PAR1_HUMAN	K.YEPFWEDEEKNESGLTEYRLVSINK.S	Y	65.9	3074.45	2	1025.83	3	47.44	21981	2	52	76
1	2	sp|P25116|PAR1_HUMAN	K.YEPFWEDEEKNESGLTEYRLVS.I	Y	57.9	2719.23	1.2	907.418	3	49.31	22640	1	52	73
1	2	sp|P25116|PAR1_HUMAN	K.YEPFWEDEEKNESGLTEYRLV.S	Y	50.42	2632.2	-2.4	878.404	3	51.24	23303	1	52	72
1	2	sp|P25116|PAR1_HUMAN	K.YEPFWEDEEKNESGLTEYRLVSIN.K	Y	45.03	2946.36	0.6	983.126	3	51.94	23552	1	52	75
1	2	sp|P25116|PAR1_HUMAN	K.YEPFWEDEEK.N	Y	44.9	1370.57	0.2	686.291	2	38.52	18696	1	52	61
1	2	sp|P25116|PAR1_HUMAN	K.YEPFWEDEEKNESGLT.E	Y	33.3	1971.84	0.7	986.927	2	43.34	20483	1	52	67
1	2	sp|P25116|PAR1_HUMAN	K.YEPFWEDEEKNESGLTE.Y	Y	31.2	2100.88	-1.3	1051.45	2	43.44	20517	1	52	68
1	2	sp|P25116|PAR1_HUMAN	Y.EPFWEDEEKNESGLTEYRLVSINK.S	Y	65.07	2911.39	0.7	971.471	3	45.91	21419	2	53	76
1	2	sp|P25116|PAR1_HUMAN	Y.EPFWEDEEKNESGLTEYRLVSIN.K	Y	34.19	2783.29	-1.5	928.77	3	50.44	23032	1	53	75
1	2	sp|P25116|PAR1_HUMAN	K.NESGLTEYRLVSINK.S	Y	61.05	1721.89	2.5	861.957	2	32.89	16087	2	62	76
1	2	sp|P25116|PAR1_HUMAN	K.NESGLTEYRLVSIN.K	Y	47.7	1593.8	1	797.908	2	39.49	19074	1	62	75
1	2	sp|P25116|PAR1_HUMAN	K.NESGLTEYRLV.S	Y	44.14	1279.64	0.4	640.828	2	35.68	17462	1	62	72
1	2	sp|P25116|PAR1_HUMAN	K.NESGLTEYRLVS.I	Y	30.75	1366.67	1.9	684.345	2	32.99	16141	1	62	73
1	2	sp|P25116|PAR1_HUMAN	E.SGLTEYRLVSINK.S	Y	46.6	1478.81	1.9	740.413	2	32.08	15656	2	64	76
1	2	sp|P25116|PAR1_HUMAN	E.SGLTEYRLVS.I	Y	44.62	1123.59	-0.2	1124.59	1	32.25	15750	2	64	73
1	2	sp|P25116|PAR1_HUMAN	G.LTEYRLVSIN.K	Y	42.8	1206.66	1.1	604.338	2	35.2	17240	1	66	75
1	2	sp|P25116|PAR1_HUMAN	G.LTEYRLVSINK.S	Y	41.6	1334.76	1.6	668.386	2	27.78	13303	2	66	76
1	2	sp|P25116|PAR1_HUMAN	L.TEYRLVSIN.K	Y	40.96	1093.58	1.4	547.796	2	30.66	14886	2	67	75
1	2	sp|P25116|PAR1_HUMAN	T.EYRLVSINKSSPLQ.K	Y	59.07	1632.88	1.3	817.45	2	31.33	15260	2	68	81
1	2	sp|P25116|PAR1_HUMAN	T.EYRLVSINKSSPLQK.Q	Y	47.9	1760.98	0.6	588	3	26.1	12370	1	68	82
1	2	sp|P25116|PAR1_HUMAN	T.EYRLVSINK.S	Y	46.23	1120.62	0.2	1121.63	1	22.99	10561	9	68	76
1	2	sp|P25116|PAR1_HUMAN	T.EYRLVS.I	Y	35.99	765.402	0.1	766.409	1	20.19	8890	3	68	73
1	2	sp|P25116|PAR1_HUMAN	T.EYRLVSIN.K	Y	35.43	992.529	1	993.537	1	29.65	14358	6	68	75
1	2	sp|P25116|PAR1_HUMAN	T.EYRLVSINKS.S	Y	33.2	1207.66	0.5	604.836	2	22.58	10324	2	68	77
1	2	sp|P25116|PAR1_HUMAN	E.YRLVSINKSSPLQ.K	Y	53.73	1503.84	0.6	752.928	2	29.02	13995	2	69	81
1	2	sp|P25116|PAR1_HUMAN	E.YRLVSINK.S	Y	40.76	991.581	-0.7	331.534	3	20.35	8990	5	69	76
1	2	sp|P25116|PAR1_HUMAN	E.YRLVSINKS.S	Y	35.13	1078.61	-0.4	360.545	3	20.31	8965	2	69	77
1	2	sp|P25116|PAR1_HUMAN	R.LVSINKSSPLQ.K	Y	45.79	1184.68	2.1	593.347	2	25.73	12158	1	71	81
1	2	sp|P25116|PAR1_HUMAN	N.KSSPLQKQLPAFISEDA.S	Y	45.57	1857.98	3.1	930.002	2	38.95	18863	1	76	92
1	2	sp|P25116|PAR1_HUMAN	N.KSSPLQKQLPAFISEDASGYLT.S	Y	33.71	2379.23	2.1	794.086	3	47.94	22154	2	76	97
1	2	sp|P25116|PAR1_HUMAN	N.KSSPLQKQLPAFISEDASGYLTS.S	Y	31.16	2466.26	1.5	823.097	3	47.44	21980	3	76	98
1	2	sp|P25116|PAR1_HUMAN	K.SSPLQKQLPA.F	Y	35.2	1067.6	0.4	534.806	2	21.58	9731	1	77	86
1	2	sp|P25116|PAR1_HUMAN	K.SSPLQKQLPAFISEDASGYLTS.S	Y	32.48	2338.17	2.5	1170.09	2	52.38	23716	2	77	98
1	2	sp|P25116|PAR1_HUMAN	K.SSPLQKQLPAF.I	Y	31.92	1214.67	1.5	608.341	2	37.78	18392	2	77	87
1	2	sp|P25116|PAR1_HUMAN	S.SPLQKQLPAFISEDASGYLTS.S	Y	33.76	2251.14	-0.3	1126.58	2	51.25	23304	1	78	98
1	2	sp|P25116|PAR1_HUMAN	Q.KQLPAFISEDASGYLTS.S	Y	54.08	1825.91	1.9	913.964	2	45.09	21120	3	82	98
1	2	sp|P25116|PAR1_HUMAN	Q.KQLPAFISEDA.S	Y	52.2	1217.63	2.8	1218.64	1	33.79	16545	3	82	92
1	2	sp|P25116|PAR1_HUMAN	Q.KQLPAFISEDASGYLT.S	Y	49.71	1738.88	1	870.447	2	45.13	21135	2	82	97
1	2	sp|P25116|PAR1_HUMAN	Q.KQLPAFIS.E	Y	39.49	902.523	0.8	903.53	1	30.19	14638	3	82	89
1	2	sp|P25116|PAR1_HUMAN	Q.KQLPAFISEDAS.G	Y	32.6	1304.66	0.1	653.338	2	32.14	15690	1	82	93
1	2	sp|P25116|PAR1_HUMAN	Q.KQLPAFISE.D	Y	31.28	1031.57	2	516.791	2	31.96	15589	1	82	90
1	2	sp|P25116|PAR1_HUMAN	K.QLPAFISEDASGYLT.S	Y	46.36	1610.78	1.7	806.4	2	54.12	24332	3	83	97
1	2	sp|P25116|PAR1_HUMAN	K.QLPAFISEDA.S	Y	42.67	1089.53	2.1	1090.54	1	44.37	20856	3	83	92
1	2	sp|P25116|PAR1_HUMAN	K.QLPAFISEDASGYLTS.S	Y	34.66	1697.81	1.8	849.916	2	53.43	24090	2	83	98
1	2	sp|P25116|PAR1_HUMAN	K.QLPAFISE.D	Y	29.26	903.47	0.9	904.478	1	42.65	20242	1	83	90
1	2	sp|P25116|PAR1_HUMAN	Q.LPAFISEDASGYLT.S	Y	47.07	1482.72	1.1	742.37	2	52.63	23805	1	84	97
1	2	sp|P25116|PAR1_HUMAN	T.SSWLTLFVPSVY.T	Y	31.01	1397.72	0.3	699.869	2	73.22	31345	1	98	109
1	2	sp|P25116|PAR1_HUMAN	S.SWLTLFVPSVY.T	Y	40.07	1310.69	0.4	656.353	2	73.88	31596	2	99	109
1	2	sp|P25116|PAR1_HUMAN	Q.VPGLNITT.C	Y	30.11	813.46	0.4	814.467	1	34.31	16824	1	246	253
1	2	sp|P25116|PAR1_HUMAN	C.HDVLNETLLEGYY.A	Y	48.56	1564.74	2.2	783.38	2	48.7	22423	1	255	267
1	2	sp|P25116|PAR1_HUMAN	S.SECQRYVY.S	Y	40.52	1046.45	1.4	524.232	2	20.72	9222	1	376	383
1	2	sp|P25116|PAR1_HUMAN	C.KESSDPSSYNSSGQLM(+15.99).A	Y	59.05	1731.73	0.8	866.871	2	23.09	10615	1	389	404	Oxidation (M)
1	2	sp|P25116|PAR1_HUMAN	C.KESSDPSSYNSSGQLM.A	Y	54.22	1715.73	0.9	858.874	2	23.05	10596	1	389	404
1	2	sp|P25116|PAR1_HUMAN	S.SDPSSYNSSGQLM(+15.99).A	Y	53.38	1387.56	-0.5	1388.56	1	27.02	12876	1	392	404	Oxidation (M)
1	2	sp|P25116|PAR1_HUMAN	S.SDPSSYNSSGQLM.A	Y	52.86	1371.56	2.1	1372.57	1	26.94	12835	2	392	404
1	2	sp|P25116|PAR1_HUMAN	S.SYNSSGQLM.A	Y	31.31	985.418	0.4	986.425	1	23.84	11062	1	396	404
1	2	sp|P25116|PAR1_HUMAN	S.YNSSGQLM.A	Y	35.38	898.385	1.2	899.394	1	23.35	10773	1	397	404
1	2	sp|P25116|PAR1_HUMAN	M.ASKMDTCSSNLNNSIYKKLLT	Y	71.02	2330.16	1.9	1166.09	2	37.21	18145	6	405	425
1	2	sp|P25116|PAR1_HUMAN	M.ASKMDTCSSNLNNSIYK.K	Y	63	1874.85	0.9	938.433	2	23.33	10762	2	405	421
1	2	sp|P25116|PAR1_HUMAN	M.ASKMDTCSSNLNNSIY.K	Y	57.58	1746.76	1.1	874.386	2	28.73	13832	1	405	420
1	2	sp|P25116|PAR1_HUMAN	M.ASKMDTCSSNLNNSIYKKLL.T	Y	56.32	2229.11	2.1	744.047	3	37.43	18243	2	405	424
1	2	sp|P25116|PAR1_HUMAN	M.ASKMDTCSSNLN.N	Y	50.4	1269.53	1	635.774	2	14.54	5590	1	405	416
1	2	sp|P25116|PAR1_HUMAN	M.ASKM(+15.99)DTCSSNLNNSIYKKLLT	Y	49.4	2346.16	-0.6	587.546	4	37.28	18176	6	405	425	Oxidation (M)
1	2	sp|P25116|PAR1_HUMAN	M.ASKMDTCSSNLNN.S	Y	48.69	1383.58	0.6	692.796	2	13.96	5260	2	405	417
1	2	sp|P25116|PAR1_HUMAN	M.ASKM(+15.99)DTCSSNLNN.S	Y	43.52	1399.57	0.6	700.793	2	13.93	5243	1	405	417	Oxidation (M)
1	2	sp|P25116|PAR1_HUMAN	M.ASKMDTCSSNLNNS.I	Y	41.24	1470.61	0.2	736.311	2	14.58	5615	1	405	418
1	2	sp|P25116|PAR1_HUMAN	M.ASKM(+15.99)DTCSSNLNNSIY.K	Y	40.55	1762.75	-0.2	882.382	2	28.77	13853	1	405	420	Oxidation (M)
1	2	sp|P25116|PAR1_HUMAN	A.SKMDTCSSNLNNSIY.K	Y	40.67	1675.72	0.4	838.867	2	28.62	13768	1	406	420
1	2	sp|P25116|PAR1_HUMAN	A.SKMDTCSSNLNNSIYKKLLT	Y	30.5	2259.12	4	754.052	3	37.08	18082	1	406	425
1	2	sp|P25116|PAR1_HUMAN	C.SSNLNNSIYKKLLT	Y	35.79	1593.87	1.1	797.944	2	34.89	17099	3	412	425
1	2	sp|P25116|PAR1_HUMAN	C.SSNLNNSIYKKLL.T	Y	32.91	1492.83	0.8	747.42	2	35.32	17298	2	412	424
1	2	sp|P25116|PAR1_HUMAN	S.SNLNNSIYKKLLT	Y	56.83	1506.84	0.3	1507.85	1	34.51	16916	7	413	425
1	2	sp|P25116|PAR1_HUMAN	S.SNLNNSIYKKLL.T	Y	35.12	1405.79	1.6	469.606	3	34.7	17011	2	413	424
1	2	sp|P25116|PAR1_HUMAN	S.SNLN(+.98)NSIYKKLLT	Y	33.28	1507.82	1.7	754.921	2	38.68	18760	1	413	425	Deamidation (NQ)
1	2	sp|P25116|PAR1_HUMAN	S.SNLNNSIY.K	Y	32.2	923.435	1.5	924.443	1	25.79	12192	2	413	420
1	2	sp|P25116|PAR1_HUMAN	N.LNNSIYKKLLT	Y	46.27	1305.77	0.8	653.891	2	32.02	15622	2	415	425
1	2	sp|P25116|PAR1_HUMAN	N.NSIYKKLLT	Y	51.07	1078.64	1.4	1079.65	1	24.41	11389	6	417	425
1	2	sp|P25116|PAR1_HUMAN	N.NSIYKKLL.T	Y	43.45	977.591	0.9	489.803	2	24.94	11696	2	417	424
1	2	sp|P25116|PAR1_HUMAN	N.N(+.98)SIYKKLLT	Y	34.19	1079.62	1.1	540.819	2	30.9	15020	1	417	425	Deamidation (NQ)
1	2	sp|P25116|PAR1_HUMAN	N.SIYKKLLT	Y	33.42	964.596	1	965.604	1	22.35	10186	13	418	425
											N-term	261
									# Spectra		central	2
											C-term	74
